# Supplementary material
Source: PubMed Central journal article supplement (PMC5412903)
Supplement: EMBR-18-765-s001.pdf [file EMBR-18-765-s001.pdf]

## Expanded View Figures

**Figure EV1. Analysis of Atg4 association with the PAS by time-lapse live-cell imaging.**

- A Cells expressing Atg4-GFP and mCherry-V5-Atg8 (RGY287) were starved in SD-N medium for 30 min and incubated with CMAC for 10 min, before being examined by time-lapse fluorescence microscopy. PAS were considered mCherry-Atg8-positive puncta adjacent to the vacuole, stained with CMAC. Images of the same cells were collected every 1 min for 15 min. For the complete movie, see the supplemental data (Movie EV1). Scale bar, 2  $\mu$ m.
- B Experiments as in panel (A) were quantified by normalizing the autophagosome cycle, defined as the interval of time from the appearance until disappearance of mCherry-Atg8 puncta [49], to 1 and integrating Atg4-GFP recruitment to the PAS overtime. Data are from four independent experiments where the PAS remained in the imaged focal planes over the course of the entire filming.

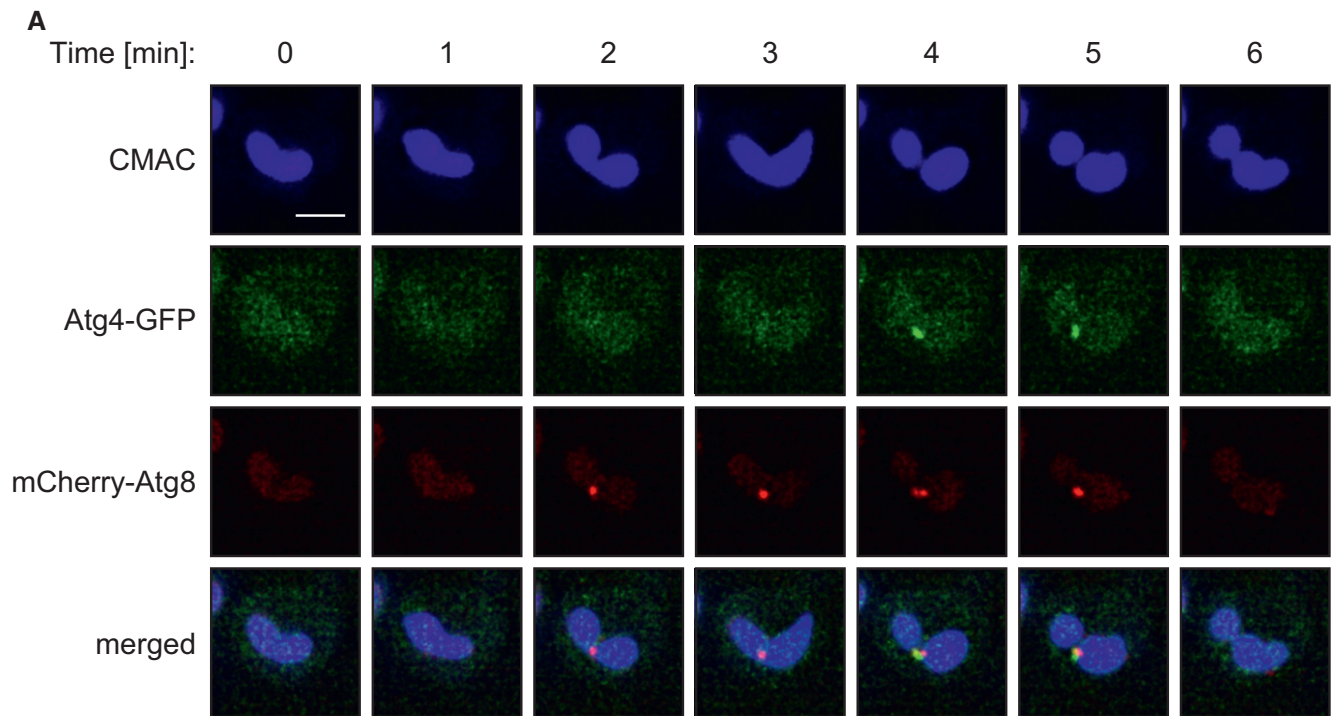

**B**

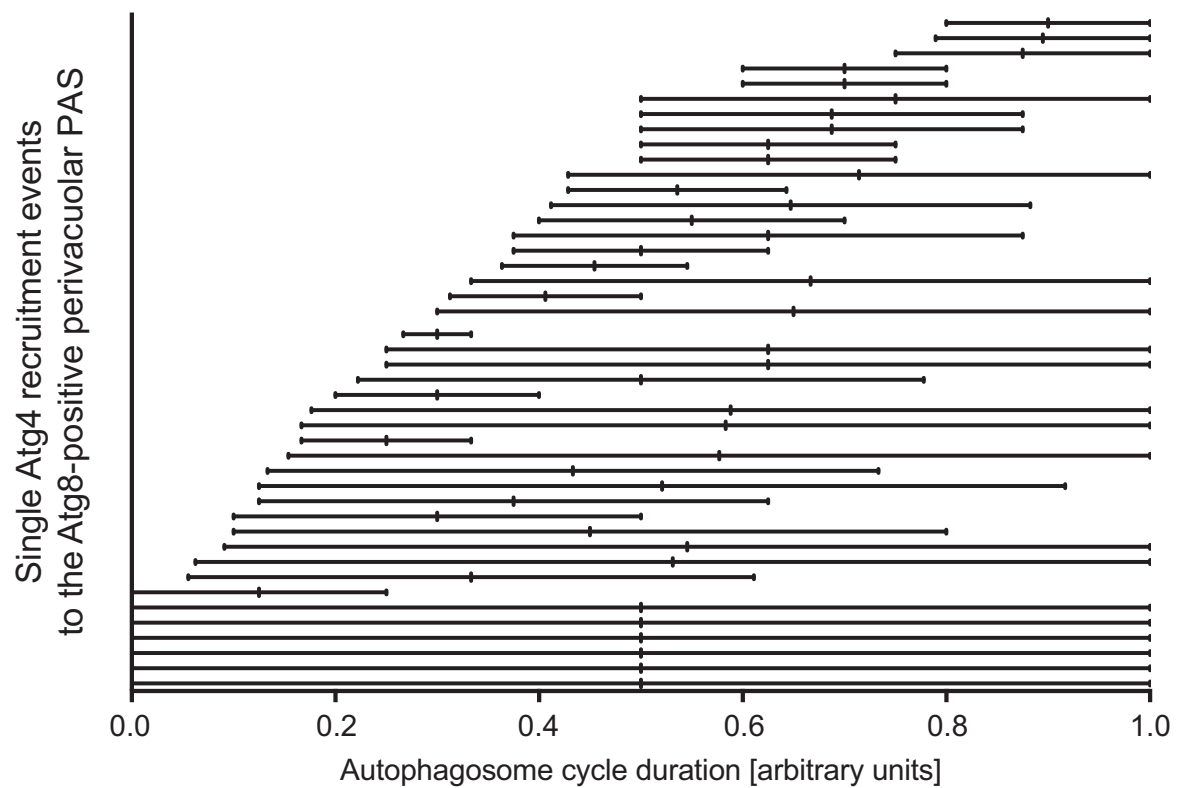

Figure EV1.

**Figure EV2. Atg4 association with the PAS does not require components of the Atg1 complex, Atg9 cycling system and PI3K complex.**

- A Fluorescence microscopy images showing the subcellular localization of Atg4-GFP in *atg13Δ* (SAY030), *atg2Δ* (SAY109), *atg9Δ* (SAY016), *atg18Δ* (SAY017), *atg6Δ* (SAY013), and *atg14Δ* (SAY110) strains analyzed as in Fig 1. White arrows highlight Atg4-GFP puncta. DIC, differential interference contrast. Scale bars, 5  $\mu$ m.
- B Percentage of cells, in the experiments shown in panel (A), that display an Atg4-GFP punctate structure. Data represent the average of three independent experiments  $\pm$  SD.
- C Subcellular localization of Atg4-GFP in double knockout cells lacking Atg1 and components of the conjugation systems leading to the formation of Atg8-PE: *atg7Δ* (SAY032), *atg3Δ* (SAY031), *atg8Δ* (SAY033), *atg10Δ* (SAY035), *atg12Δ* (SAY134), and *atg16Δ* (SAY135). Cells were grown and imaged as in Fig 1. DIC, differential interference contrast. Scale bars, 5  $\mu$ m.

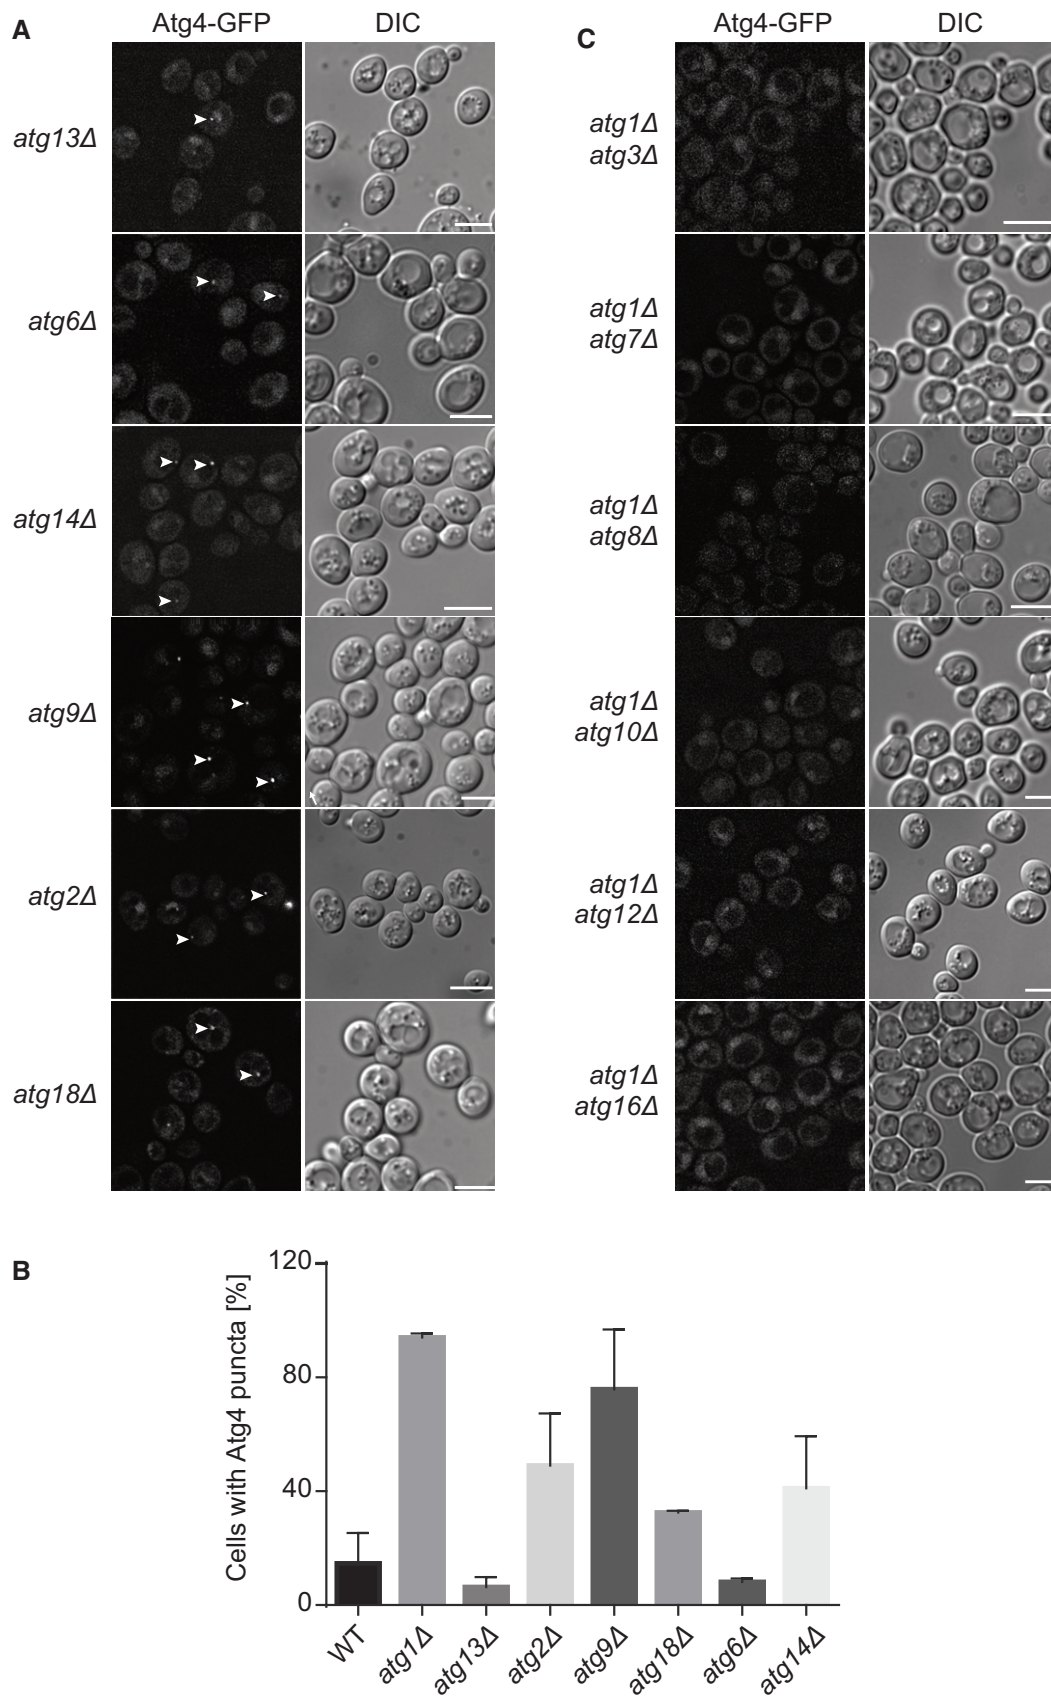

Figure EV2.

**Figure EV3. Putative LIR (pLIR) motifs in *S. cerevisiae* Atg4 and their conservation among eukaryotes.**

- A *Saccharomyces cerevisiae* Atg4 amino acid sequence. The catalytic site (C147, D322, and H324) is highlighted in red, while the putative LIR motifs are indicated in blue.
- B The amino acid sequence of the regions flanking the two conserved pLIR motifs of *S. cerevisiae* Atg4 (in blue), that is, F102 to I105 (pLIR2) and Y424 to I427 (pLIR4), were aligned with that of homologous proteins from different species using the Kalign alignment tool (<http://www.ebi.ac.uk/Tools/msa/kalign/>). UniprotKB accession numbers are *C. albicans* Atg4 (Q59UG3), *A. nidulans* Atg4 (Q5B7L0), *S. cerevisiae* Atg4 (P53867), *K. lactis* Atg4 (Q6CQ60), *C. elegans* Atg4.1 (Q9NA30), *C. elegans* Atg4.2 (Q9U1N6), *D. melanogaster* Atg4 (M9PBM3), *D. rerio* Atg4B (Q6DG88), *M. musculus* ATG4A (Q8C9S8), *M. musculus* ATG4B (Q8BGE6), *M. musculus* ATG4C (Q811C2), *M. musculus* ATG4D (Q8BQV9), *H. sapiens* ATG4A (Q8WYNO), *H. sapiens* ATG4B (Q9Y4P1), *H. sapiens* ATG4C (Q96DT6), and *H. sapiens* ATG4D (Q86TL0). The asterisk indicates conservation of the residue while two dots designate similarity.

**A**

1 MQRWLQLWKM DLVQKVSHGV FEGSSEEPAA LMNHD**YIVL**G EVYPERDEES GAEQCEQDCR  
**pLIR1**

61 YRGEAVSDGF LSSLFGREIS SYTKEFLLDV QSRVNFYRT R**FVPI**ARAPD GPSPLSLNLL  
**pLIR2**

121 VRTNPISTIE DYIANPDCFN TDIGWG**C**MIR TGQSLLGNAL QILHLGRDFR VNGNESLERE

181 SKFVNWFNDT PEAPFSLHNF VSAGTELSDK R**P**GEWFGPAA TARSIQSLIY GFPECGIDDC

241 IVSVSSGDIY ENEVEKVFAE NPNSRILFLL GVKLGINAVN ESYRESICGI LSSTQSVGIA

301 GGRPSSSLYF FGYQGNEFLH **FDP**HIPQPAV EDSFVESCHT SKFGKLQLSE MDPSMLIGIL

361 IKGEKDWQQW KLEVAESAI I NVLAKRMDDF DVSCSMDDVE SVSSNSMKKD ASNNENLGVL

421 EGD**YVDI**GAI FPHTTNTEDV DEYDC**FQDI**H CKKQKIVVMG NTHTVNANLT DYEVEGLVLE  
**pLIR4** **pLIR3**

481 KETVGIHSPI DEKC

**B**

|          | <u>pLIR2</u>          |     | <u>pLIR4</u>          |     |
|----------|-----------------------|-----|-----------------------|-----|
| CaAtg4   | SYRCG <b>F</b> EPI PK | 100 | DEEEE <b>F</b> INLNV  | 408 |
| AnAtg4   | TYRSN <b>F</b> PPI PK | 94  | DEVEA <b>F</b> DDL DV | 400 |
| ScAtg4   | TYRTR <b>F</b> VPI AR | 107 | VLEGD <b>Y</b> VDIGA  | 429 |
| KIAtg4   | TYRTQ <b>F</b> TPIRR  | 82  | QDTGE <b>Y</b> VDVGT  | 401 |
| CeAtg4.2 | TYRTD <b>F</b> PAL LD | 192 | ADKHG <b>F</b> EML    | 521 |
| MmAtg4C  | TYREE <b>F</b> PQIEA  | 100 | FSTEE <b>F</b> VLL    | 458 |
| HsAtg4C  | TYREE <b>F</b> PQIEG  | 100 | FSTEE <b>F</b> VLL    | 458 |
| MmAtg4D  | TYRRD <b>F</b> PPLAG  | 133 | PSSD <b>F</b> VFL     | 471 |
| HsAtg4D  | TYRRD <b>F</b> PPLPG  | 133 | PSSD <b>F</b> VFL     | 471 |
| CeAtg4.1 | TYRRD <b>F</b> SPIGG  | 74  | KIDDD <b>F</b> EVLDV  | 434 |
| DmAtg4A  | TYRHG <b>F</b> SPLGE  | 87  | SDSDS <b>F</b> AI VES | 386 |
| MmAtg4A  | TYRRK <b>F</b> SPIGG  | 66  | ELEED <b>F</b> EILSV  | 395 |
| DrAtg4B  | TYRRK <b>F</b> SPIGG  | 66  | DLEED <b>F</b> EILSV  | 394 |
| HsAtg4A  | TYRKN <b>F</b> QPIGG  | 63  | SEDEE <b>F</b> EILSL  | 398 |
| MmAtg4B  | TYRRN <b>F</b> PAIGG  | 63  | SEDED <b>F</b> EILGG  | 393 |
| HsAtg4B  | TYRKN <b>F</b> PAIGG  | 63  | SEDED <b>F</b> EILSL  | 393 |
|          | * * * :               |     | : :                   |     |

Figure EV3.

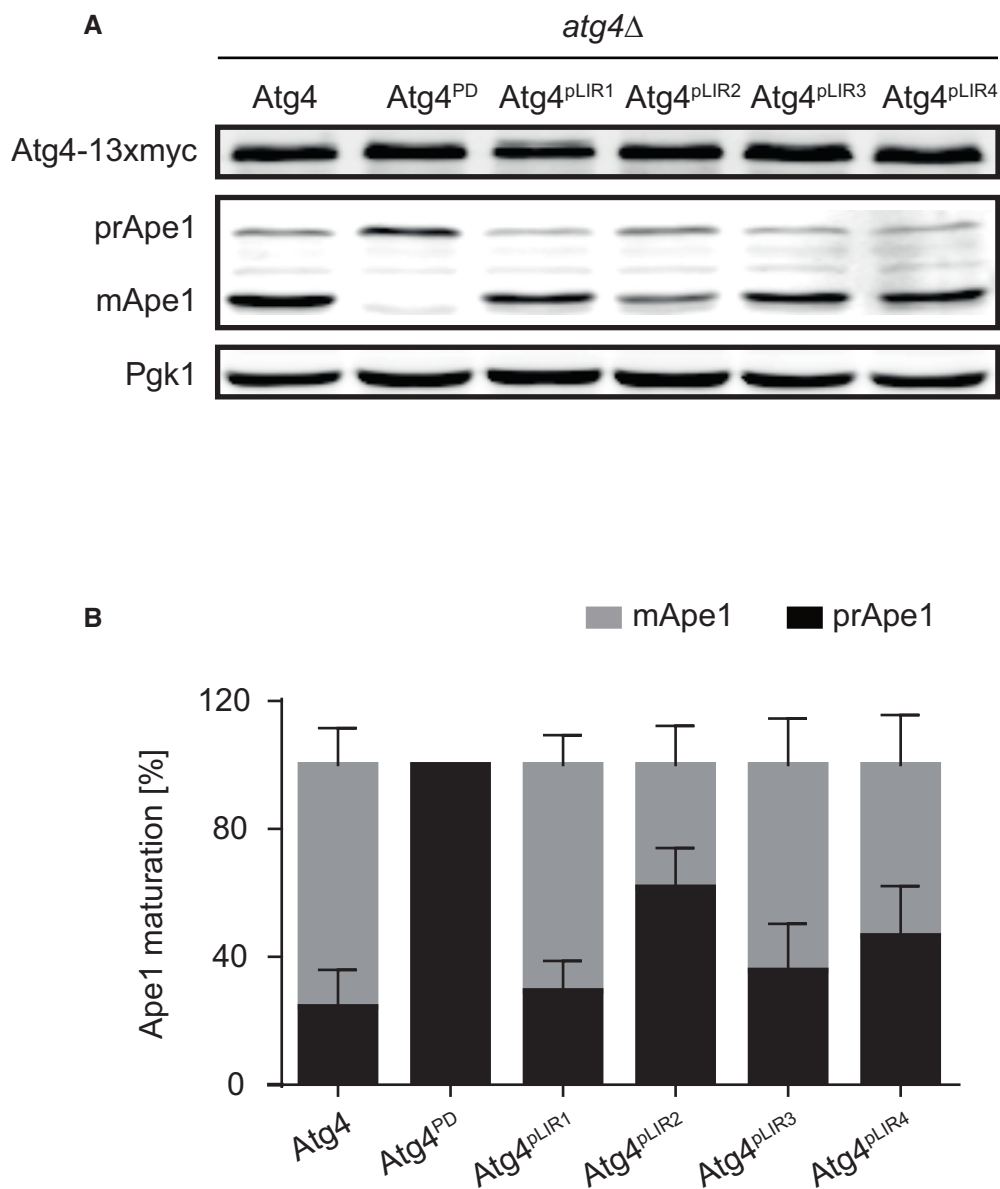

**Figure EV4. Atg4 LIR2 motif is essential for the Cvt pathway.**

- A The strains described in Fig 2C were grown to an exponential log phase before proteins were precipitated with TCA and analyzed by Western blotting with anti-myc, anti-Ape1, and anti-Pgk1 antibodies.
- B The percentage of prApe1 and mApe1 in the experiment shown in panel (A) were quantified, and values were plotted. Data represent the average of five independent experiments  $\pm$  SD.
